# Supplementary material for: Transcriptomic study of ciprofloxacin resistance in Streptomyces coelicolor A3(2)
Source: Royal Society of Chemistry journal article supplement (doi:10.1039/c3mb70341j), 2013-09-24
Supplement: c3mb70341j.pdf [file c3mb70341j.pdf]

## **Transcriptomic study of ciprofloxacin resistance in *Streptomyces coelicolor* A3(2)**

**Minal Patkari, Sarika Mehra \***

Supplementary files

SF1: List of all upregulated and down regulated genes

SF2: Microarray Protocol (details)

SF3: Learning set for computational analysis

| Gene                                                  | Annotation                                     | Fold Change | P value  |
|-------------------------------------------------------|------------------------------------------------|-------------|----------|
| <b>Genes upregulated in response to ciprofloxacin</b> |                                                |             |          |
| <b>DNA Replication/Repair</b>                         |                                                |             |          |
| SCO0760                                               | putative methyltransferase                     | 1.7         | 1.88E-04 |
| SCO1343                                               | uracil-DNA glycosylase                         | 2.8         | 9.12E-04 |
| SCO1520                                               | crossover junction endodeoxyribonuclease       | 2.8         | 0.03     |
| SCO1958                                               | ABC excision nuclease subunit A                | 2.9         | 1.29E-05 |
| SCO1966                                               | ABC excision nuclease subunit B                | 7.3         | 1.11E-03 |
| SCO2003                                               | DNA polymerase I                               | 3.7         | 7.24E-07 |
| SCO2863                                               | putative helicase                              | 7.7         | 3.35E-02 |
| SCO3351                                               | putative DNA repair protein                    | 2.1         | 2.89E-03 |
| SCO3541                                               | putative DNA polymerase                        | 2.2         | 2.29E-03 |
| SCO3873                                               | DNA gyrase subunit A                           | 1.6         | 0.04     |
| SCO4577                                               | putative helicase                              | 2.0         | 0.04     |
| SCO5143                                               | DNA-3-methyladenine glycosylase I              | 1.7         | 3.66E-03 |
| SCO5494                                               | putative DNA ligase                            | 4.6         | 2.33E-05 |
| SCO5566                                               | putative ATP-dependent DNA helicase            | 2.7         | 1.11E-04 |
| SCO5761                                               | putative ATP-dependent DNA helicase            | 2.8         | 2.78E-03 |
| SCO5815                                               | putative ATP-dependent DNA helicase            | 4.1         | 0.02     |
| SCO6084                                               | putative DNA polymerase                        | 4.0         | 9.36E-05 |
| SCO7522                                               | putative DNA ligase                            | 3.6         | 6.66E-04 |
| SCO6341                                               | putative exonuclease                           | 3.0         | 0.02     |
| SCO4814                                               | bifunctional purine biosynthesis protein       | 1.6         | 0.01     |
| SCO4647                                               | transcription antitermination protein          | 1.6         | 0.01     |
| SCO4729                                               | DNA-directed RNA polymerase alpha chain        | 1.6         | 2.23E-03 |
| SCO6743                                               | putative transcriptional accessory protein     | 2.9         | 9.75E-05 |
| SCO3542                                               | integral membrane protein with kinase activity | 2.3         | 3.53E-03 |
| SCO2064                                               | DNA polymerase III alpha chain                 | 2.4         | 2.06E-03 |
| SCO3878                                               | DNA polymerase III, beta chain                 | 1.5         | 0.01     |
| SCO4067                                               | DNA polymerase III subunit gamma               | 2.0         | 0.01     |
| SCO5769                                               | recombinase A                                  | 4.6         | 2.37E-04 |
| <b>Transport</b>                                      |                                                |             |          |
| SCO1964                                               | putative export associated protein             | 1.7         | 1.11E-03 |
| SCO1965                                               | putative export associated protein             | 2.0         | 6.63E-05 |
| SCO2257                                               | probable ABC transporter, NBD                  | 1.5         | 0.01     |
| SCO2258                                               | probable ABC-transporter, MSD                  | 1.8         | 0.01     |
| SCO4963                                               | putative ABC transporter ATP-binding protein   | 2.8         | 2.04E-04 |
| SCO4964                                               | putative integral membrane transport protein   | 3.6         | 0.04     |
| <b>Translation and ribosomes</b>                      |                                                |             |          |
| SCO1600                                               | putative translation initiation factor IF-3    | 1.5         | 1.44E-03 |
| SCO4661                                               | elongation factor G                            | 1.6         | 2.23E-04 |

|                             |                                                  |     |          |
|-----------------------------|--------------------------------------------------|-----|----------|
| SCO4725                     | translational initiation factor IF1              | 1.7 | 2.71E-03 |
| SCO4981                     | putative bifunctional protein                    | 1.7 | 0.03     |
| SCO3906                     | putative 30S ribosomal protein S6                | 1.5 | 2.78E-04 |
| SCO3908                     | putative 30S ribosomal protein S18               | 1.8 | 7.53E-04 |
| SCO3909                     | 50S ribosomal protein L9                         | 1.5 | 3.92E-06 |
| SCO4649                     | 50S ribosomal protein L1                         | 1.5 | 0.02     |
| SCO4652                     | 50S ribosomal protein L10                        | 1.5 | 2.22E-04 |
| SCO4659                     | 30S ribosomal protein S12                        | 1.6 | 1.17E-03 |
| SCO4701                     | 30S ribosomal protein S10                        | 1.7 | 8.52E-04 |
| SCO4702                     | 50S ribosomal protein L3                         | 1.8 | 1.58E-03 |
| SCO4704                     | 50S ribosomal protein L23                        | 1.6 | 1.86E-02 |
| SCO4706                     | 30S ribosomal protein S19                        | 1.5 | 2.38E-02 |
| SCO4709                     | 50S ribosomal protein L16                        | 1.6 | 8.33E-05 |
| SCO4712                     | 50S ribosomal protein L14                        | 1.5 | 0.02     |
| SCO4714                     | 50S ribosomal protein L5                         | 1.7 | 4.18E-05 |
| SCO4721                     | 50S ribosomal protein L15                        | 1.5 | 2.51E-03 |
| SCO4727                     | 30S ribosomal protein S13                        | 1.6 | 1.45E-06 |
| SCO4728                     | 30S ribosomal protein S11                        | 1.6 | 6.78E-04 |
| SCO4734                     | 50S ribosomal protein L13                        | 1.7 | 9.93E-06 |
| SCO4735                     | 30S ribosomal protein S9                         | 1.8 | 7.55E-07 |
| SCO5591                     | 30S ribosomal protein S16                        | 1.5 | 0.02     |
| SCO5624                     | 30S ribosomal protein S2                         | 1.5 | 3.03E-05 |
| <b>Secondary metabolism</b> |                                                  |     |          |
| SCO5071                     | hydroxylacyl-CoA dehydrogenase                   | 1.7 | 5.37E-04 |
| SCO5073                     | putative oxidoreductase                          | 1.5 | 0.05     |
| SCO5074                     | putative dehydratase                             | 1.5 | 1.41E-03 |
| SCO5075                     | putative oxidoreductase                          | 1.9 | 9.61E-04 |
| SCO5079                     | conserved hypothetical protein                   | 1.7 | 4.52E-03 |
| SCO5087                     | actinorhodin polyketide beta-ketoacyl synthase   | 1.8 | 1.12E-04 |
| SCO5088                     | actinorhodin polyketide beta-ketoacyl synthase   | 2.0 | 1.06E-03 |
| SCO7147                     | putative ketoreductase                           | 3.3 | 8.51E-05 |
| <b>Regulation</b>           |                                                  |     |          |
| SCO2105                     | putative transcriptional regulatory protein      | 2.8 | 1.17E-07 |
| SCO2564                     | putative DNA-binding protein                     | 3.8 | 6.62E-05 |
| SCO4122                     | putative MarR-family transcriptional regulator   | 4.2 | 1.17E-07 |
| SCO2950                     | DNA-binding protein Hu (hs1)                     | 1.7 | 0.01     |
| SCO5770                     | RecX, putative regulatory protein                | 6.0 | 6.62E-05 |
| SCO4895                     | putative ECF sigma factor                        | 3.9 | 1.21E-06 |
| SCO3013                     | putative two-component system response regulator | 1.5 | 0.04     |
| SCO5749                     | two-component regulator                          | 1.5 | 0.05     |
| <b>Not classified</b>       |                                                  |     |          |
| SCO4945                     | putative dehydrogenase                           | 1.7 | 0.03     |
| SCO5051                     | putative glycosyltransferase                     | 1.7 | 1.06E-03 |

|                                        |                                                |     |          |
|----------------------------------------|------------------------------------------------|-----|----------|
| <b>SCO5227</b>                         | putative redoxin                               | 1.5 | 0.01     |
| <b>SCO6687</b>                         | putative DNA-binding protein                   | 2.0 | 0.02     |
| <b>SCO6984</b>                         | putative oxidoreductase.                       | 7.6 | 4.90E-06 |
| <b>Hypothetical protein</b>            |                                                |     |          |
| <b>SCO1291</b>                         | hypothetical protein SCBAC36F5.02              | 2.6 | 0.01     |
| <b>SCO1342</b>                         | hypothetical protein                           | 7.1 | 2.35E-05 |
| <b>SCO1404</b>                         | hypothetical protein                           | 1.7 | 0.05     |
| <b>SCO2211</b>                         | hypothetical protein SC10B7.06                 | 4.2 | 4.18E-04 |
| <b>SCO2353</b>                         | hypothetical protein                           | 4.3 | 1.22E-05 |
| <b>SCO2862</b>                         | hypothetical protein SCE20.36c.                | 1.8 | 0.01     |
| <b>SCO2912</b>                         | hypothetical protein                           | 1.5 | 0.01     |
| <b>SCO3022</b>                         | hypothetical protein SCE34.03c                 | 2.3 | 4.44E-03 |
| <b>SCO3050</b>                         | hypothetical protein                           | 7.7 | 1.89E-05 |
| <b>SCO4226</b>                         | hypothetical protein                           | 1.5 | 0.05     |
| <b>SCO4346</b>                         | hypothetical protein SCD19.01c                 | 2.7 | 2.63E-03 |
| <b>SCO4611</b>                         | hypothetical protein SCD39.11                  | 4.4 | 0.01     |
| <b>SCO4802</b>                         | hypothetical protein SCD63A.13c                | 2.3 | 1.64E-03 |
| <b>SCO4894</b>                         | hypothetical protein 2SCK8.20c                 | 2.6 | 5.63E-04 |
| <b>SCO7843</b>                         | hypothetical protein SC8E7.40c.                | 1.9 | 0.04     |
| <b>Biosynthesis of cofactors</b>       |                                                |     |          |
| <b>SCO5859</b>                         | ferrochelatase                                 | 2.0 | 0.01     |
| <b>SCO6041</b>                         | putative protoporphyrinogen oxidase            | 2.1 | 0.02     |
| <b>SCO2104</b>                         | putative thiamin phosphate pyrophosphorylase   | 3.4 | 3.67E-04 |
| <b>Membrane Proteins</b>               |                                                |     |          |
| <b>SCO4643</b>                         | UDP-N-acetylenoylpyruvoylglucosamine reductase | 2.6 | 9.02E-04 |
| <b>SCO1409</b>                         | putative membrane protein.                     | 1.6 | 2.67E-03 |
| <b>SCO2809</b>                         | putative membrane protein                      | 1.7 | 0.02     |
| <b>SCO3570</b>                         | putative membrane protein                      | 1.5 | 0.02     |
| <b>SCO5099</b>                         | putative membrane protein                      | 1.5 | 0.02     |
| <b>SCO5664</b>                         | putative integral membrane protein             | 2.0 | 0.01     |
| <b>SCO0628</b>                         | putative secreted protein                      | 1.7 | 0.02     |
| <b>SCO1292</b>                         | putative secreted protein                      | 4.0 | 3.93E-05 |
| <b>SCO2116</b>                         | putative secreted protein                      | 1.9 | 0.04     |
| <b>SCO2591</b>                         | putative secreted protein                      | 1.5 | 0.04     |
| <b>SCO2725</b>                         | putative lipoprotein                           | 3.0 | 2.56E-04 |
| <b>SCO2808</b>                         | putative secreted protein                      | 1.5 | 0.02     |
| <b>SCO5029</b>                         | putative secreted protein                      | 1.5 | 5.69E-04 |
| <b>SCO6096</b>                         | putative lipoprotein                           | 2.2 | 2.17E-07 |
| <b>Conserved Hypothetical Proteins</b> |                                                |     |          |
| <b>SCO0162</b>                         | conserved hypothetical protein SCJ1.11         | 1.8 | 0.02     |

|                |                                            |     |          |
|----------------|--------------------------------------------|-----|----------|
| <b>SCO0563</b> | conserved hypothetical protein SCF73.10c   | 5.5 | 2.20E-07 |
| <b>SCO1181</b> | conserved hypothetical protein SCG11A.12   | 3.2 | 1.58E-05 |
| <b>SCO1183</b> | conserved hypothetical protein SCG11A.14   | 3.5 | 7.58E-04 |
| <b>SCO1184</b> | conserved hypothetical protein SCG11A.15   | 1.6 | 0.05     |
| <b>SCO1406</b> | hypothetical protein                       | 1.6 | 0.03     |
| <b>SCO1925</b> | conserved hypothetical protein             | 1.6 | 0.05     |
| <b>SCO1653</b> | conserved hypothetical protein SCI41.36    | 4.0 | 0.03     |
| <b>SCO1729</b> | hypothetical protein                       | 1.6 | 0.05     |
| <b>SCO1950</b> | hypothetical protein                       | 2.0 | 0.01     |
| <b>SCO1952</b> | conserved hypothetical protein             | 1.7 | 4.40E-04 |
| <b>SCO2204</b> | hypothetical protein SC3H12.12             | 2.2 | 4.76E-04 |
| <b>SCO2340</b> | hypothetical protein                       | 1.6 | 0.03     |
| <b>SCO2901</b> | hypothetical protein                       | 1.7 | 0.02     |
| <b>SCO2986</b> | conserved hypothetical protein SCE50.14c   | 1.5 | 1.82E-03 |
| <b>SCO3568</b> | conserved hypothetical protein             | 2.1 | 0.02     |
| <b>SCO3858</b> | conserved hypothetical protein             | 1.5 | 0.04     |
| <b>SCO3900</b> | conserved hypothetical protein             | 2.1 | 3.78E-03 |
| <b>SCO4113</b> | conserved hypothetical protein             | 3.2 | 7.60E-06 |
| <b>SCO4631</b> | hypothetical protein SCD82.01c             | 2.7 | 4.83E-04 |
| <b>SCO4803</b> | conserved hypothetical protein             | 7.1 | 3.44E-05 |
| <b>SCO5047</b> | conserved hypothetical protein GlpX        | 1.6 | 8.39E-03 |
| <b>SCO5240</b> | hypothetical protein                       | 2.1 | 6.37E-04 |
| <b>SCO5570</b> | hypothetical protein                       | 1.8 | 0.04     |
| <b>SCO5645</b> | conserved hypothetical protein SC6A9.22c   | 2.1 | 0.05     |
| <b>SCO6085</b> | conserved hypothetical protein             | 2.0 | 7.87E-04 |
| <b>SCO6120</b> | hypothetical protein SC9B2.07              | 3.6 | 6.23E-04 |
| <b>SCO6510</b> | conserved hypothetical protein SC1E6.19c   | 1.8 | 1.16E-03 |
| <b>SCO6686</b> | conserved hypothetical protein             | 5.2 | 3.91E-04 |
| <b>SCO6953</b> | conserved hypothetical protein SC6F7.06c   | 1.9 | 5.14E-05 |
| <b>SCO6983</b> | conserved hypothetical protein SC8F11.09.  | 3.5 | 4.36E-06 |
| <b>Others</b>  |                                            |     |          |
| <b>SCO0869</b> | putative anti-sigma factor antagonist      | 1.5 | 0.01     |
| <b>SCO3795</b> | aspartyl-tRNA synthetase                   | 1.6 | 3.29E-03 |
| <b>SCO4612</b> | putative amino acid transporter            | 1.8 | 0.03     |
| <b>SCO5059</b> | polyphosphate glucokinase                  | 2.3 | 0.01     |
| <b>SCO2026</b> | putative glutamate synthase large subunit  | 1.6 | 0.03     |
| <b>SCO2532</b> | PhoH-like protein                          | 1.7 | 1.65E-03 |
| <b>SCO4145</b> | polyphosphate kinase                       | 1.9 | 1.88E-04 |
| <b>SCO3049</b> | putative acyl-CoA hydrolase                | 2.7 | 1.09E-04 |
| <b>SCO5374</b> | ATP synthase epsilon chain                 | 1.5 | 0.02     |
| <b>SCO7417</b> | putative cytochrome P450-family protein.   | 2.6 | 2.87E-05 |
| <b>SCO3731</b> | cold-shock protein                         | 1.6 | 0.01     |
| <b>SCO4684</b> | cold shock protein                         | 1.5 | 2.84E-04 |
| <b>SCO1405</b> | putative heat shock protein (hsp90-family) | 4.7 | 4.19E-03 |

| Gene                                                     | Annotation                                      | Fold change | P value  |
|----------------------------------------------------------|-------------------------------------------------|-------------|----------|
| <b>Down Regulated genes in response to ciprofloxacin</b> |                                                 |             |          |
| <b>Chaperons</b>                                         |                                                 |             |          |
| SCO3670                                                  | heat chock protein                              | 2.4         | 5.33E-03 |
| SCO3671                                                  | heat shock protein 70 (fragment)                | 1.9         | 0.05     |
| SCO4296                                                  | chaperonin 2                                    | 1.8         | 0.01     |
| SCO4761                                                  | 10 kD chaperonin cpn10                          | 2.1         | 9.23E-05 |
| SCO4762                                                  | 60 kD chaperonin cpn60                          | 2.3         | 6.53E-04 |
| <b>Conserved hypothetical protein</b>                    |                                                 |             |          |
| SCO0910                                                  | conserved hypothetical protein SCM1.43          | 1.6         | 0.03     |
| SCO0921                                                  | conserved hypothetical protein SCM10.10c        | 2.0         | 6.46E-05 |
| SCO1222                                                  | conserved hypothetical protein                  | 1.5         | 0.02     |
| SCO1375                                                  | conserved hypothetical protein SC10A9.17        | 2.3         | 0.01     |
| SCO1566                                                  | putative acyltransferase                        | 1.6         | 1.14E-03 |
| SCO1640                                                  | conserved hypothetical protein SCI41.23c        | 1.7         | 6.38E-06 |
| SCO2065                                                  | conserved hypothetical protein                  | 1.6         | 0.02     |
| SCO3790                                                  | conserved hypothetical protein                  | 1.8         | 1.96E-03 |
| SCO4201                                                  | conserved hypothetical protein                  | 1.5         | 0.04     |
| SCO4675                                                  | conserved hypothetical protein SCD40A.21c       | 1.5         | 0.01     |
| SCO5581                                                  | conserved hypothetical protein                  | 1.5         | 0.02     |
| SCO5746                                                  | hypothetical protein SC7C7.01                   | 1.5         | 3.67E-03 |
| SCO6176                                                  | conserved hypothetical protein                  | 1.5         | 0.01     |
| SCO6192                                                  | conserved hypothetical protein SC2G5.13         | 1.7         | 0.03     |
| SCO7251                                                  | conserved hypothetical protein                  | 1.6         | 3.34E-03 |
| SCO7617                                                  | conserved hypothetical protein                  | 1.8         | 4.26E-03 |
| SCO7748                                                  | conserved hypothetical protein                  | 1.5         | 0.01     |
| <b>Metabolism</b>                                        |                                                 |             |          |
| SCO1661                                                  | putative glycerol-3-phosphate dehydrogenase     | 1.7         | 0.03     |
| SCO6199                                                  | secreted esterase                               | 2.1         | 1.13E-03 |
| SCO2766                                                  | putative secreted ribonuclease                  | 2.1         | 2.45E-04 |
| SCO1969                                                  | putative DNA-methyltransferase                  | 1.6         | 0.05     |
| SCO6717                                                  | putative acyl-[acyl-carrier protein] desaturase | 2.0         | 6.67E-04 |
| SCO5144                                                  | putative acyl CoA isomerase                     | 1.5         | 3.82E-03 |
| SCO6691                                                  | putative phospholipase C                        | 1.9         | 2.60E-03 |
| <b>Secreted proteins</b>                                 |                                                 |             |          |
| SCO0131                                                  | putative secreted protein                       | 1.6         | 4.38E-03 |
| SCO0297                                                  | putative secreted protein                       | 1.7         | 1.24E-04 |
| SCO1048                                                  | putative secreted protein                       | 1.9         | 3.60E-04 |
| SCO1196                                                  | putative secreted protein                       | 2.3         | 4.28E-04 |
| SCO1230                                                  | putative secreted tripeptidylaminopeptidase     | 1.5         | 0.05     |
| SCO1565                                                  | putative glycerophosphoryl diester              | 1.6         | 3.17E-05 |

|                             |                                                    |     |          |
|-----------------------------|----------------------------------------------------|-----|----------|
|                             | phosphodiester                                     |     |          |
| SCO1860                     | putative secreted protein                          | 1.7 | 0.01     |
| SCO1906                     | putative secreted protein                          | 1.6 | 6.47E-05 |
| SCO1908                     | putative large secreted protein                    | 1.8 | 2.63E-03 |
| SCO2068                     | hypothetical protein "putative secreted alkaline p | 1.7 | 1.72E-04 |
| SCO2348                     | putative secreted protein                          | 3.2 | 1.49E-05 |
| SCO2383                     | putative secreted protein                          | 1.5 | 1.24E-04 |
| SCO4428                     | putative secreted protein                          | 1.5 | 1.02E-04 |
| SCO5013                     | putative secreted protein                          | 1.6 | 2.14E-04 |
| SCO5014                     | putative secreted protein                          | 1.6 | 0.03     |
| SCO5015                     | putative secreted protein                          | 1.6 | 1.62E-03 |
| SCO6198                     | putative secreted protein                          | 2.2 | 1.08E-03 |
| SCO7550                     | putative secreted hydrolase                        | 1.8 | 3.19E-03 |
| SCO7631                     | putative secreted protein                          | 1.8 | 1.45E-03 |
| <b>Membrane proteins</b>    |                                                    |     |          |
| SCO6005                     | putative lipoprotein                               | 1.5 | 0.02     |
| SCO0644                     | putative membrane protein.                         | 1.7 | 1.62E-03 |
| SCO1160                     | putative membrane protein                          | 1.5 | 3.86E-03 |
| SCO1630                     | putative integral membrane protein                 | 1.9 | 8.87E-04 |
| SCO5650                     | putative membrane protein                          | 1.6 | 1.61E-03 |
| SCO7536                     | putative integral membrane protein.                | 1.9 | 0.01     |
| SCO5998                     | putative bifunctional protein (fragment) "putative | 1.7 | 0.01     |
| SCO3375                     | putative Lsr2-like protein                         | 1.9 | 1.55E-03 |
| <b>Regulator</b>            |                                                    |     |          |
| SCO5033                     | hydrogen peroxide sensing regulator                | 1.5 | 0.02     |
| SCO6323                     | putative tetR-family regulatory protein            | 2.2 | 0.01     |
| SCO3668                     | putative heat shock protein                        | 2.1 | 0.04     |
| <b>hypothetical protein</b> |                                                    |     |          |
| SCO0682                     | hypothetical protein SCF15.03c                     | 2.2 | 1.50E-03 |
| SCO1993                     | hypothetical protein                               | 1.7 | 2.11E-03 |
| SCO2384                     | hypothetical protein SC4A7.12                      | 1.9 | 2.68E-04 |
| SCO3350                     | alanine-rich hypothetical protein                  | 1.7 | 2.93E-04 |
| SCO3371                     | hypothetical protein                               | 2.0 | 1.06E-03 |
| SCO6145                     | hypothetical protein SC1A9.09                      | 1.5 | 1.21E-03 |
| <b>Not classified</b>       |                                                    |     |          |
| SCO2286                     | putative alkaline phosphatase                      | 2.2 | 7.79E-04 |
| SCO5249                     | putative nucleotide-binding protein                | 2.4 | 7.99E-05 |
| SCO5473                     | putative ATP/GTP binding protein                   | 1.6 | 3.72E-03 |
| SCO5679                     | putative aldehyde dehydrogenase                    | 1.7 | 0.01     |
| SCO7697                     | putative secreted hydrolase                        | 1.5 | 4.08E-05 |
| <b>Secondary metabolism</b> |                                                    |     |          |
| SCO5890                     | putative 8-amino-7-oxononanoate synthase           | 1.5 | 0.04     |

|                  |                                                       |     |          |
|------------------|-------------------------------------------------------|-----|----------|
| <b>SCO5893</b>   | oxidoreductase                                        | 2.0 | 2.84E-06 |
| <b>SCO5894</b>   | thioesterase                                          | 2.5 | 7.51E-04 |
| <b>SCO5895</b>   | putative methyltransferase                            | 2.7 | 9.36E-05 |
| <b>SCO5896</b>   | phosphoenolpyruvate-utilizing enzyme                  | 2.4 | 4.72E-04 |
| <b>SCO5897</b>   | putative oxidase                                      | 3.8 | 2.37E-04 |
| <b>SCO5898</b>   | probable membrane protein                             | 3.8 | 3.80E-05 |
| <b>SCO6273</b>   | putative type I polyketide synthase                   | 2.1 | 1.26E-05 |
| <b>SCO6282</b>   | putative 3-oxoacyl-[acyl-carrier protein] reducta     | 2.2 | 0.05     |
| <b>SCO3232</b>   | CDA peptide synthetase III                            | 2.9 | 5.31E-06 |
| <b>SCO3233</b>   | putative hydrolase                                    | 2.2 | 4.02E-05 |
| <b>SCO3234</b>   | putative phosphotransferase                           | 3.6 | 2.46E-06 |
| <b>SCO6276</b>   | putative secreted protein                             | 1.8 | 0.01     |
| <b>Transport</b> |                                                       |     |          |
| <b>SCO2164</b>   | putative integral membrane efflux protein "putativ    | 1.5 | 0.05     |
| <b>SCO2231</b>   | putative maltose-binding protein                      | 1.9 | 0.03     |
| <b>SCO3507</b>   | putative integral membrane efflux protein             | 1.5 | 0.01     |
| <b>SCO5113</b>   | BldKB, putative ABC transport system lipoprotein      | 1.5 | 0.01     |
| <b>SCO5396</b>   | putative cellulose-binding protein                    | 1.6 | 3.29E-04 |
| <b>Others</b>    |                                                       |     |          |
| <b>SCO3672</b>   | putative cell surface biosynthesis associated protein | 1.6 | 9.38E-07 |
| <b>SCO6284</b>   | putative decarboxylase                                | 1.6 | 0.01     |
| <b>SCO6471</b>   | putative citratelase                                  | 1.5 | 1.74E-03 |
| <b>SCO4152</b>   | putative secreted 5'-nucleotidase                     | 2.3 | 3.37E-05 |
| <b>SCO2259</b>   | putative multi-domain regulatory protein.             | 1.8 | 0.01     |
| <b>SCO3023</b>   | adenosylhomocysteinase                                | 1.6 | 7.67E-04 |
| <b>SCO1968</b>   | putative secreted hydrolase                           | 2.3 | 4.73E-06 |
| <b>SCO5750</b>   | ftsK homolog                                          | 1.6 | 5.37E-04 |



## SF2: Experimental details of Microarray Hybridization

Microarray hybridizations were optimized in our lab at IIT Bombay. The protocol was based on that developed at University of Minnesota in Prof. Wei-Shou Hu lab. In addition, the protocol developed by TIGR was also used. The detailed steps followed during the experiments are given below:

### 1. Aminoallyl-labelled cDNA synthesis

1. In an RNase-free tube, combine the following reagents:

|                          |               |
|--------------------------|---------------|
| component                |               |
| Total RNA                | 10 µg         |
| Random Hexamers (3mg/mL) | 9 µg          |
| DEPC water               | Up to 18.5 µl |

2. Mix well and incubate at 70°C for 10 minutes.
3. Chill on ice for 5 min. Centrifuge above 10,000 rpm briefly to bring down any condensation.
4. Mix the RNA/primers with reverse transcriptase and buffers:

|                          |                |
|--------------------------|----------------|
| RNA/primer mix           | 18.5µl         |
| 5x First Strand buffer   | 6 µl           |
| 0.1 M DTT                | 3 µl           |
| dNTP/aa-UTP labeling mix | 0.6µl          |
| SuperscriptIII           | 2 µl           |
| <b>Total</b>             | <b>30.1 µl</b> |

5. Mix and incubate at  
25°C for 5 min  
37°C 10 min  
50°C 1 hr 45 min
6. Stop the first strand synthesis reaction
7. Hydrolyze the RNA in the cDNA/RNA mixture by adding:
  - 0.5 M EDTA 10 µL
  - 1 M NaOH 10 µL
8. Mix and incubate at 65°C for 15 minutes.
9. Centrifuge above 10,000 rpm briefly to bring down any condensation.
10. Add 25 µL 1 M Tris (pH 7.0) to neutralize pH.

### Removal of unincorporated aa-dUTP and free amines

1. Vigorously mix cDNA reaction with 400 µL (5X reaction volume) PB buffer (Qiagen supplied) before transferring to MinElute column.
2. Centrifuge at 13,000 rpm for 1 minute. Empty flow through.

- To wash, add 750  $\mu\text{L}$  phosphate wash buffer to the column and centrifuge at 13,000 rpm for 1 minute.
- Empty the collection tube and centrifuge the column an additional 1 minute at  $\sim$ 13,000 rpm to remove residual wash buffer.
- Transfer column to a new 1.5 mL microfuge tube and carefully add 30  $\mu\text{L}$  phosphate elution buffer to the center of the column membrane.
- Let sit for  $\sim$ 1 minute at room temperature.
- Elute by centrifugation at 13,000 rpm for 1 minute.
- Elute a second time into the same tube by repeating with another 30  $\mu\text{L}$  of phosphate elution buffer, incubating an additional minute, and centrifuging sample.
- The final elution volume should be  $\sim$ 60  $\mu\text{L}$ .
- Take readings of undiluted samples at wavelength of 260 to determine cDNA concentration.
- Transfer the open tube to a speed vac and dry it down to completion ( $\sim$ 30 minutes).

|           |  |  |  |  |
|-----------|--|--|--|--|
| A230      |  |  |  |  |
| A260      |  |  |  |  |
| A280      |  |  |  |  |
| A320      |  |  |  |  |
| A260/A280 |  |  |  |  |
| A260/A230 |  |  |  |  |
| Conc.     |  |  |  |  |
| yeild     |  |  |  |  |

## 2. Coupling aminoallyl-labelled cDNA to Alexa dyes.

- Add 10  $\mu\text{L}$  of dry DMSO to each vial of alexa dyes and mix well to dissolve the dye completely.
- Resuspend aminoallyl-labeled cDNA in 4.5  $\mu\text{L}$  0.1 M sodium carbonate buffer pH 9.3 by pipetting up and down for several minutes making sure that the pellet is thoroughly resuspended.
- Add 3  $\mu\text{L}$  of the appropriate resuspended Alexa dye. Pipet up and down several times to thoroughly mix the sample.
- Incubate the reaction at room temperature for at least 1 hour.
- After coupling has finished, add 35  $\mu\text{L}$  100 mM NaOAc pH 5.2.

## 3. Pre-hybridization

### Pre-hybridization solution

- Set the waterbath at 42°C.
- Prepare 50 ml prehybridization buffer for every 5 slides:
- (5x SSC, 0.1% SDS, 1% BSA)

| Recipe:            | Amount            |
|--------------------|-------------------|
| 20x SSC            | 15 mL             |
| 10% SDS            | 600 $\mu\text{L}$ |
| BSA powder         | 0.6 gm            |
| MilliQ/DI water to | 60 mL             |

4. Filter the prehybridization buffer with a 0.22 µm Mini-Miser (CA) Filter.
5. Transfer the solution to a clean Coplin jar (50ml centrifugation tube) and preheat the buffer at 42°C for approximately 10 minutes.
6. Place the printed slide(s) with their labels up in a Coplin jar containing preheated pre-hybridization buffer. Incubate at 42°C for at least an hour.

### Washing Prehybridized Slides

7. Following the prehybridization, remove slides from 42°C waterbath. Pour out the prehybridization buffer, being careful not to pour the slides out as well.
8. Quickly fill the 50ml centrifugation tube with MilliQ water and replace the cap.
9. Carefully shake the Coplin jar for approximately 30 seconds to remove the prehybridization buffer from the slides.
10. Pour out the water and repeat the procedure approximately five times or until froth can no longer be seen in the water.
11. Fill a glass staining dish with MilliQ/DI water
12. Using forceps *carefully* grip the slides by the label and then remove the slides from the Coplin jar. Place them in the slide rack for a glass staining dish.
13. place the slide rack with the slides inside the staining dish.
14. Place the entire staining dish apparatus on top of a rotor shaker and let shake for about 2 minutes.
15. Change the water inside the staining dish every 2 minutes. Continue to wash until you have used ~2 liters total of wash water
16. Empty the staining dish and fill with isopropyl alcohol.
17. Wash in the isopropyl alcohol for two minutes on the rotary shaker. When done, leave the slides in the isopropyl alcohol and take them immediately to the centrifuge.

### Drying Slides

**Note:** *DO NOT* let the slides start to dry before putting them in the centrifuge.

*Allowing the slides to slowly air dry will cause background to appear on the slide.*

18. Take the glass slide rack with the slides out of the isopropyl alcohol and remove the metal handle from the holder.
19. Put the slides into a centrifuge with a flat plate-holder adaptor lined with paper towels. Centrifuge the slides at ~1000 RPM's for at least 10 minutes at RT
20. Hold slides up to the light to check for any degree of streaking or spots. If any of these appear the slides must be re-washed and re-spun.

The slides should be used immediately

### 4. Removal of free dye by using qiagen PCR purification kit

1. Make 1.6 ml PE buffer [0.32mL PE concentrate (Qiagen supplied) +1.28 mL Ethanol]
2. Vigorously mix cDNA reaction with 250 µL (5X reaction volume) PB buffer (Qiagen supplied) before transferring to MinElute column.
3. Centrifuge at ~13,000 rpm for 1 minute. Empty flow through.
4. To wash, add 750 µL **PE Buffer** to the column and centrifuge at 13,000 rpm for 1 minute.

5. Empty the collection tube and centrifuge the column an additional 1 minute at 13,000rpm to remove residual PE buffer.
6. Transfer column to a new 1.5 mL microfuge tube and carefully add 30  $\mu$ L EB buffer(Qiagen supplied) to the center of the column membrane.
7. Let sit for ~1 minute at room temperature.
8. Elute by centrifugation at 13,000 rpm for 1 minute.
9. Elute a second time into the same tube by repeating with another 30  $\mu$ L of EB buffer, incubating an additional minute, and centrifuging sample..
10. The final elution volume should be ~60  $\mu$ L.
11. Take readings of undiluted samples at  $\lambda_{260}$  using lead factor 10

### 5.Dye Coupling statistics:

| Absorbance               |  |  |  |  |
|--------------------------|--|--|--|--|
| A230                     |  |  |  |  |
| A260                     |  |  |  |  |
| A280                     |  |  |  |  |
| A320                     |  |  |  |  |
| A555                     |  |  |  |  |
| A647                     |  |  |  |  |
| Adye                     |  |  |  |  |
| A260/A280                |  |  |  |  |
| A260/A230                |  |  |  |  |
| Conc.                    |  |  |  |  |
| FOI                      |  |  |  |  |
| Dye conc. Pmole/ $\mu$ l |  |  |  |  |
| YEILD                    |  |  |  |  |

Dry the labeled cDNA in speedVac for about 30-45 minutes

### 6. Hybridization

#### Hybridization Mix

|                         |  |
|-------------------------|--|
| Component               |  |
| Formamide               |  |
| 20X SSC                 |  |
| 10% SDS                 |  |
| DTT                     |  |
| MilliQ H <sub>2</sub> O |  |

Add 60 $\mu$ l salmon sperm DNA/ml of Hyb Mix.

Add the hybridization mix to the pelleted probes (both cDNA)

Denature the cDNA probe for 5 minutes at 95°C, vortex thoroughly and again heat at 95°C for 5 min in the heat block

#### Array hybridization:

- 1.Preheat the waterbath at 50°C

2. Clean the Hybridization chamber and make it ready for putting slide
3. Drop the Lifterr slip on the array carefully entirely covering the printed area and so that some void space created on array and then slowly release the probe near to one edge of the array
4. Transfer the array in Hybridization chamber and wrap with AL foil without inverting it
5. Put the Hybridization chamber in water bath and allow to hybridize for 15 hrs at 50°C
6. Start Time \_\_\_\_\_ End Time \_\_\_\_\_

## 7. Washing

**Preheat the low stringency buffer to 55°C before use. Prior to beginning the post-hybridization washes, add 1 mL of 100 mM DTT to 1 L of each of the wash buffers.**

1. After the incubation at 50°C for 14-16h, remove foil and unseal hybridization chamber. Remove the slide from the chamber, taking care not to disturb the cover slip.
2. Fill a Pyrex glass dish about half full with low stringency buffer that has been warmed to 55°C.
3. To remove the coverslip grab the slide label with forceps and submerge it in the buffer. Shake the slide to loosen the coverslip. With time the coverslip will slide free of the slide surface.
4. Continue to wash the slide vigorously for about an additional minute once the cover slip has been removed.
5. Change the low stringency buffer in the Pyrex dish for every 5 slides washed. As the cover slips are removed, place every 5 slides in a glass slide holder. The slides should be spread out so they do not touch each other or the sides of the holder (as above).
6. Submerge the slide holder(s) into staining dish(s) containing **low stringency** wash buffer (preheated to 55°C). Agitate on a rotary shaker for 5 minutes.
7. After the 5 minutes, transfer the slides to a dish with new **low stringency** buffer (preheated to 55°C). Agitate an additional 5 minutes.
8. After the 5 minutes, transfer the slides to a dish with **medium stringency** buffer at room temperature and agitate 5 minutes.
9. After the 5 minutes, transfer the slides to a dish with new **medium stringency** buffer at room temperature. Agitate an additional 5 minutes.
10. After the 5 minutes, transfer the slides to a dish with **high stringency** buffer at room temperature and agitate 5 minutes.
11. After the 5 minutes, transfer the slides to a dish with new **high stringency** buffer at room temperature and agitate another 5 minutes.
12. After the 5 minutes, keep slides in the **high stringency buffer** (with DTT) until ready for scanning.
13. Dip one slide at a time several times in a dish containing clean MilliQ/DI water.
14. Dry the slide in a mini-slide centrifuge for approximately one minute. Ensure slide is completely dry before scanning.
15. Scan slide

### SF3: Learning set for computational analysis

---

| <b>Gene</b> | <b>Annotation</b>                        |
|-------------|------------------------------------------|
| SCO1343     | uracil-DNA glycosylase                   |
| SCO1520     | crossover junction endodeoxyribonuclease |
| SCO1958     | ABC excision nuclease subunit A          |
| SCO1966     | ABC excision nuclease subunit B          |
| SCO2003     | DNA polymerase I                         |
| SCO2863     | putative helicase                        |
| SCO3351     | putative DNA repair protein              |
| SCO3541     | putative DNA polymerase                  |
| SCO3543     | probable DNA topoisomerase I             |
| SCO4577     | putative helicase                        |
| SCO4797     | putative ATP-dependent DNA helicase II   |
| SCO5494     | putative DNA ligase                      |
| SCO5566     | putative ATP-dependent DNA helicase      |
| SCO5761     | putative ATP-dependent DNA helicase      |
| SCO5769     | recombinase A                            |
| SCO5770     | RecX, putative regulatory protein        |
| SCO5803     | SOS regulatory protein                   |
| SCO5815     | putative ATP-dependent DNA helicase      |
| SCO6084     | putative DNA polymerase                  |
| SCO7522     | putative DNA ligase                      |

---
